# Supplementary material for: Unexpectedly efficient activation of push–pull nitriles by a PtII center toward dipolar cycloaddition of Z-nitrones
Source: Royal Society of Chemistry journal article supplement (doi:10.1039/c0dt01689f), 2011-01-01
Supplement: c0dt01689f.pdf [file c0dt01689f.pdf]

## SUPPLEMENTARY MATERIAL

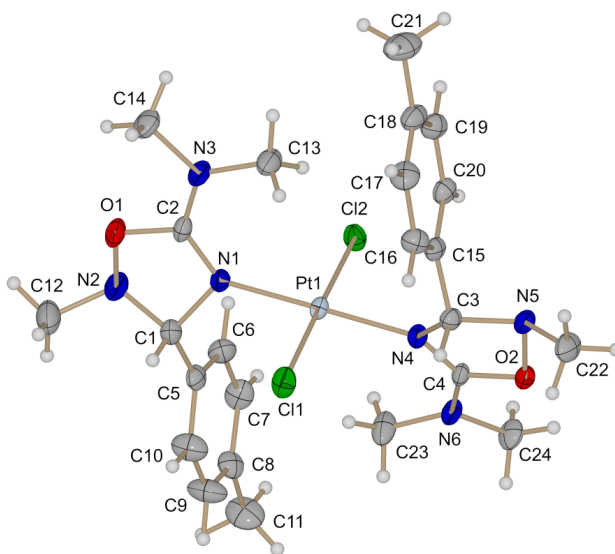

**Figure S1.** View of **2a** with the atomic numbering scheme. Thermal ellipsoids are drawn at the 50% probability level. Selected bond lengths (Å) and angles (°): Pt(1)–N(4) 2.018(3), Pt(1)–N(1) 2.020(3), Pt(1)–Cl(1) 2.3112(9), Pt(1)–Cl(2) 2.3162(9), N(1)–C(2) 1.305(5), N(1)–C(1) 1.475(4), N(2)–C(1) 1.480(5), N(4)–C(4) 1.303(4), N(4)–C(3) 1.469(4), N(5)–C(3) 1.480(4), N(4)–Pt(1)–N(1) 178.60(12), Cl(1)–Pt(1)–Cl(2) 177.56(3).

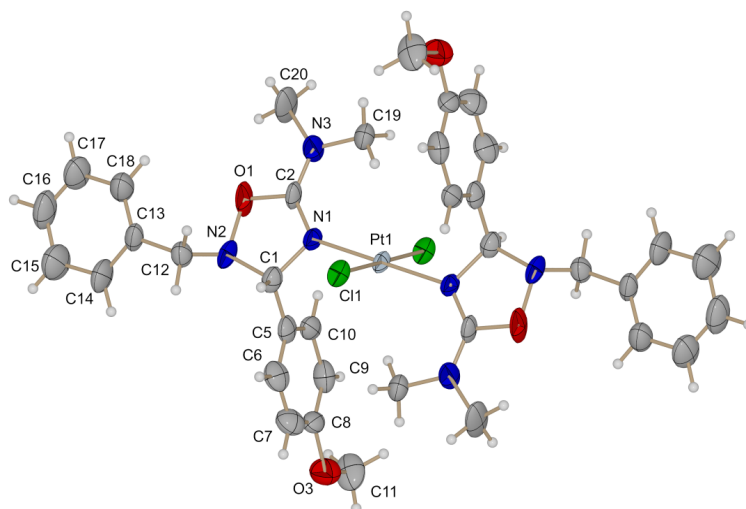

**Figure S2.** View of **2d** with the atomic numbering scheme. Thermal ellipsoids are drawn at the 50% probability level. Selected bond lengths (Å) and angles (°): Pt(1)–N(1) 2.023(7), Pt(1)–Cl(1) 2.307(2), 5 N(1)–C(2) 1.285(11), N(1)–C(1) 1.468(12), N(2)–C(1) 1.508(11), N(3)–C(2) 1.298(13), N(1)–Pt(1)–Cl(1) 88.1(2).
