# Supplementary material for: Unexpectedly efficient activation of push–pull nitriles by a PtII center toward dipolar cycloaddition of Z-nitrones
Source: Royal Society of Chemistry journal article supplement (doi:10.1039/c0dt01689f), 2011-01-01
Supplement: c0dt01689f_1.pdf [file c0dt01689f_1.pdf]

The reactions were performed in a CDCl<sub>3</sub> solution (0.5 mL CDCl<sub>3</sub>, 0.5 mmol of each of two studied complexes, 0.5 mmol of the nitron) at 35 C and the reactions were monitored by <sup>1</sup>H NMR spectroscopy. Hexamethyldisiloxane was used as an internal standard. The spectra were registered immediately after the addition of the dipole to the reaction mixture and then after 0.25, 0.75, 2, 4, 9, and 20 h; after 36 h, the nitron was not detected in the <sup>1</sup>H NMR spectra.

The ratio  $\frac{k_1}{k_2}$  was obtained in accord with the formula

$$\frac{k_1}{k_2} = \frac{S(X)_t}{S(Y_i)_t},$$

where  $S(X)_t$  and  $S(Y_i)_t$  are integral intensities of signals of the C<sup>3</sup>H proton of the oxadiazole ring from X and Y<sub>i</sub> (**Scheme 2**).

The formula was obtained by simplification of the following expression:

$$\frac{k_1}{k_2} = \frac{[X]_t[B_i]_0}{[Y_i]_t[A]_0} = \frac{[(S(X)_t/a)/(S(HMDS)/a)][(S(B_i)_0/a)/(S(HMDS)/a)]}{[(S(Y_i)_t/a)/(S(HMDS)/a)][(S(A)_0/a)/(S(HMDS)/a)]}.$$

$$\frac{[B_i]_0}{[A]_0} = 1,$$

where

- $[X]_t$  and  $[Y_i]_t$  are concentrations of X and Y<sub>i</sub>, respectively, at certain time;
- $S(X)_t$  and  $S(Y_i)_t$  are integral intensities of signals of the C<sup>3</sup>H proton from X and Y<sub>i</sub>, respectively, in the spectra registered at certain time;
- $S(B_i)_0$  is integral intensity of signals of the nitrile ligand protons in B<sub>i</sub> (CH<sub>3</sub> from NMe<sub>2</sub>, 6H, for B<sub>1</sub>; CH<sub>3</sub> from NEt<sub>2</sub>, 12H, for B<sub>2</sub> and α-CH<sub>2</sub> from NC<sub>5</sub>H<sub>10</sub>, 8H, for B<sub>3</sub>) and  $S(A)_0$  is integral intensity of signal of aromatic protons of A in the spectra registered upon the beginning of the experiment;
- $a_j$  is number of protons displaying by corresponding group.
